# Supplementary material for: Embryonic Carcinoma Cells Show Specific Dielectric Resistance Profiles during Induced Differentiation
Source: PubMed Central journal article supplement (PMC3606267; doi:10.1371/journal.pone.0059895), 2013-03-22
Supplement: pone.0059895.s004.pdf [file pone.0059895.s004.pdf]

**Table S1.** Slope maxima of RA-treated NT2 cells

| treatment     | max. slope | time (h) | slope/time ratio |
|---------------|------------|----------|------------------|
| control       | 0.009055   | 91.59    | 0.000099         |
| 10 nM RA      | 0.005505   | 65.67    | 0.000094         |
| 500 nM RA     | 0.009422   | 68.72    | 0.000137         |
| 1 $\mu$ M RA  | 0.020599   | 79.26    | 0.000260         |
| 5 $\mu$ M RA  | 0.024929   | 59.42    | 0.000420         |
| 10 $\mu$ M RA | 0.029899   | 59.92    | 0.000499         |
