# Supplementary material for: Embryonic Carcinoma Cells Show Specific Dielectric Resistance Profiles during Induced Differentiation
Source: PubMed Central journal article supplement (PMC3606267; doi:10.1371/journal.pone.0059895), 2013-03-22
Supplement: pone.0059895.s005.pdf [file pone.0059895.s005.pdf]

**Table S2.** Slope maxima of drug-treated NT2 cells

| treatment | max. slope | time (h) | slope/time ratio |
|-----------|------------|----------|------------------|
| control   | 0.017534   | 100.76   | 0.000174         |
| dC        | 0.015210   | 69.92    | 0.000218         |
| RA        | 0.040009   | 75.84    | 0.000528         |
| FGF       | 0.063303   | 56.26    | 0.001125         |
| HMBA      | 0.052056   | 102.09   | 0.000510         |
| DAC       | 0.006171   | 47.76    | 0.000129         |
| AZA       | 0.004313   | 95.34    | 0.000045         |
| araC      | 0.030684   | 40.67    | 0.000754         |
