# Supplementary material for: Embryonic Carcinoma Cells Show Specific Dielectric Resistance Profiles during Induced Differentiation
Source: PubMed Central journal article supplement (PMC3606267; doi:10.1371/journal.pone.0059895), 2013-03-22
Supplement: pone.0059895.s006.pdf [file pone.0059895.s006.pdf]

**Table S3.** Slope maxima of araC- and AZA-treated NT2 cells

| treatment      | max. slope | time (h) | slope/time ratio |
|----------------|------------|----------|------------------|
| control        | 0.016393   | 84.75    | 0.000193         |
| 10 nM araC     | 0.038219   | 59.58    | 0.000641         |
| 100 nM araC    | 0.040043   | 49.75    | 0.000805         |
| 250 nM araC    | 0.040542   | 40.25    | 0.001007         |
| 500 nM araC    | 0.042165   | 33.25    | 0.001268         |
| 1 $\mu$ M araC | 0.039774   | 33.92    | 0.001173         |
| 10 nM AZA      | 0.039077   | 72.08    | 0.000542         |
| 100 nM AZA     | 0.011582   | 43.17    | 0.000268         |
| 250 nM AZA     | 0.014941   | 46.25    | 0.000323         |
| 500 bM AZA     | 0.007572   | 37.08    | 0.000204         |
| 1 $\mu$ M AZA  | neg. slope | -        | -                |
