# Supplementary material for: Embryonic Carcinoma Cells Show Specific Dielectric Resistance Profiles during Induced Differentiation
Source: PubMed Central journal article supplement (PMC3606267; doi:10.1371/journal.pone.0059895), 2013-03-22
Supplement: pone.0059895.s007.pdf [file pone.0059895.s007.pdf]

**Table S4.** Slope maxima of OCT4-depleted NT2 cells

| treatment | max. slope | time (h) | slope/time ratio |
|-----------|------------|----------|------------------|
| control   | 0.012303   | 142.67   | 0.000086         |
| kd OCT4   | 0.037599   | 92.67    | 0.000406         |
