# Supplementary material for: Embryonic Carcinoma Cells Show Specific Dielectric Resistance Profiles during Induced Differentiation
Source: PubMed Central journal article supplement (PMC3606267; doi:10.1371/journal.pone.0059895), 2013-03-22
Supplement: pone.0059895.s008.pdf [file pone.0059895.s008.pdf]

**Table S5.** RT-Primer pairs (5'-3'):

|                      |            |                                                  |
|----------------------|------------|--------------------------------------------------|
| HOXA1                | for<br>rev | GCCGTACTCTCCAACCTTTC<br>CTCGCCTCAATACATTCACC     |
| SNAP25               | for<br>rev | GCCAGATCGACAGGATCATG<br>CAACCTTTGGAAAGAAAGAGAC   |
| NANOG                | for<br>rev | CCTCAGCCTCCAGCAGATG<br>GGTCTGGTTGCTCCACATTG      |
| OCT4                 | for<br>rev | CTGACAACAATGAAAATCTTCAG<br>GTTACAGAACCACACTCGGAC |
| $\beta$ -ACTINE      | for<br>rev | GATCAAGATCATTGCTCCTCCTG<br>CTAGAAGCATTGCGGTGGAC  |
| NESTIN               | for<br>rev | GCGGCTGCGGGCTACTGAAA<br>CCAGGAGGGTCCTGTACGTGGC   |
| $\beta$ -TUBULIN III | for<br>rev | CACGAGCACACTGTGGGGCA<br>ACTTCCCAGAACTGTGGACGCCTG |
